# Supplementary material for: Serum Helicobacter pylori NapA antibody as a potential biomarker for gastric cancer
Source: PubMed Central journal article supplement — Sci Rep. 2014 Feb 20;4:4143. doi: 10.1038/srep04143 (PMC3929916; doi:10.1038/srep04143), 2014-02-20
Supplement: srep04143-s1.pdf [file srep04143-s1.pdf]

## Supplementary Information

### Serum *Helicobacter pylori* NapA antibody as a potential biomarker for gastric cancer

Jingjing Liu<sup>1</sup>, Huimin Liu<sup>2</sup>, Tingting Zhang<sup>1</sup>, Xiyun Ren<sup>1</sup>, Christina Nadolny<sup>3</sup>, Xiaoqun Dong<sup>3</sup>, Lina Huang<sup>1</sup>, Kexin Yuan<sup>1</sup>, Wenjing Tian<sup>1\*</sup>, Yunhe Jia<sup>4\*</sup>

<sup>1</sup> Department of Epidemiology, College of Public Health, Harbin Medical University, Harbin, Heilongjiang Province, P. R. China.

<sup>2</sup> Department of neurology, The forth affiliated hospital, Harbin Medical University, Harbin 150001, Heilongjiang Province, P. R. China.

<sup>3</sup> Department of Biomedical and Pharmaceutical Sciences, College of Pharmacy, The University of Rhode Island, Pharmacy Building, 7 Greenhouse Road, Kingston, RI 02881.

<sup>4</sup> Department of Colorectal Cancer Surgery, The third affiliated hospital, Harbin Medical University, Harbin 150081, Heilongjiang Province, P. R. China.

#### \*Correspondence to:

Wenjing Tian, M.D., Ph.D., Department of Epidemiology, College of Public Health, Harbin Medical University, 197 Xuefu Road, Harbin 150081, Heilongjiang Province, P. R. China. Tel: +86-451-87502685; Fax: +86-451-87502885; E-mail: twj8267@sina.com.

Yunhe Jia, M.D., Ph.D., Department of Colorectal Cancer Surgery, The third affiliated hospital, Harbin Medical University, 149 Xuefu Road, Harbin 150081, Heilongjiang Province, P. R. China. Tel: +86-451-86298096; Fax: +86-451-86663760; E-mail: 13945676987@126.com.

## Supplementary Figure S1

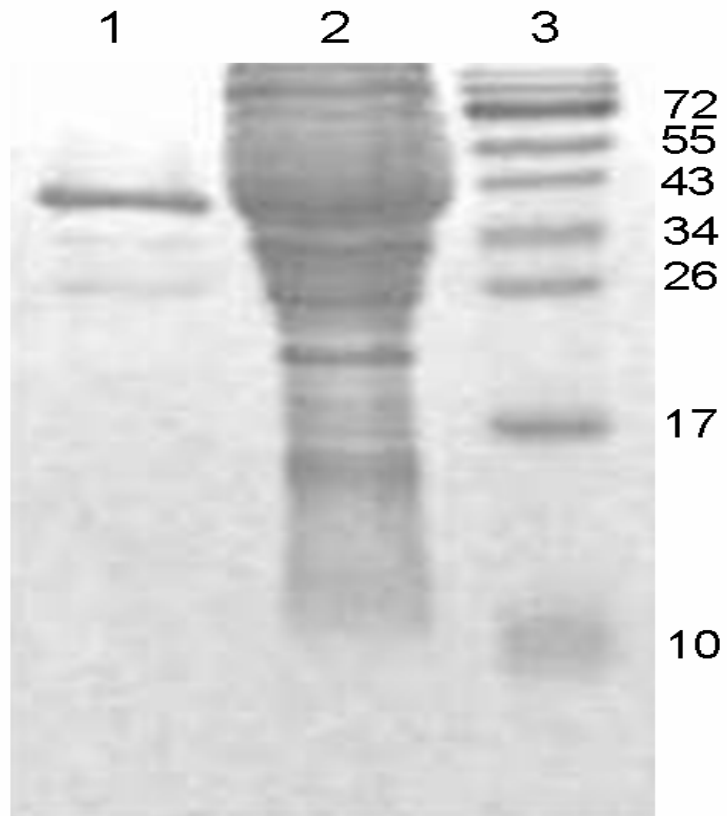

### SDS-PAGE analysis of purified NapA

Note: 1. Purified protein NapA; 2. Unpurified protein NapA; 3. Marker.

## Supplementary Figure S2

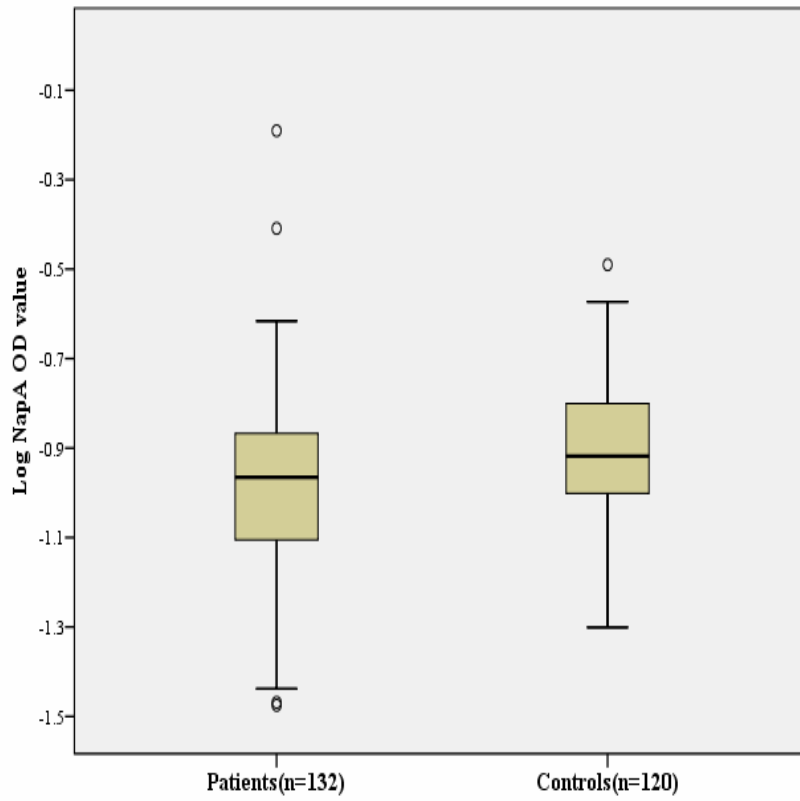

**Box plot of serum NapA antibody levels for cases and controls in subjects infected by *H. pylori* (log-scale)**

### Supplementary Figure S3

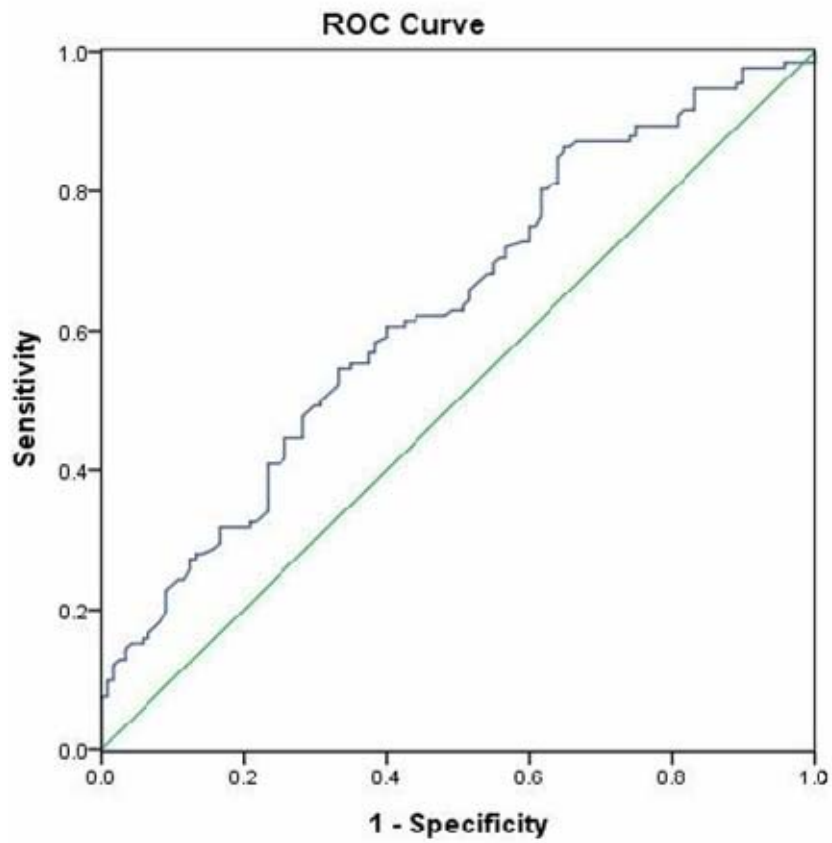

Areas under ROC curves for protein NapA antibody titer (AUC = 0.63,  $P < 0.05$ ) in *H. pylori* infected individuals
